# Supplementary material for: Serum uric acid as a marker of disease risk, severity, and survival in systemic sclerosis-related pulmonary arterial hypertension
Source: PubMed Central journal article supplement — Pulm Circ. 2019 Jul 29;9(3):2045894019859477. doi: 10.1177/2045894019859477 (PMC6664664; doi:10.1177/2045894019859477), 2019-07-29
Supplement: Supplemental_Material.pdf [file Supplemental_Material.pdf]

## Figure Legend

**Supplemental Figure 1.** Box and whisker plot demonstrating differences in UA levels in subjects with PAH versus those with no PH. Boxes represent interquartile range (IQR) and horizontal lines represent medians (6.9 mg/dL for PAH and 5.2 mg/dL for no PH). Whiskers represent closest values within 1.5 times the IQR. Dots represent individual measurements exceeding the values represented by the whiskers.

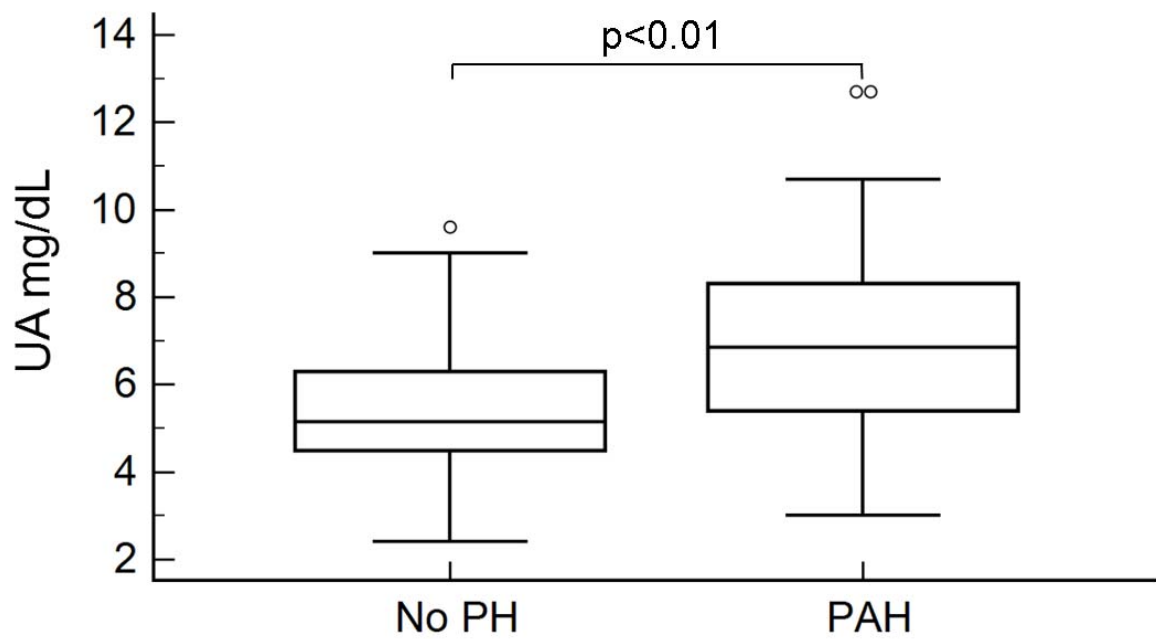

Supplemental Figure 1.

**Supplemental Table 1. Characteristics of Subjects with PH by WHO Grouping**

|                                      | <b>Group I<br/>(n=82)</b> | <b>Group 2<br/>(n=12)</b> | <b>Group 3<br/>(n=17)</b> |
|--------------------------------------|---------------------------|---------------------------|---------------------------|
| <b>Age, years</b>                    | 62 (13)                   | 66 (9)                    | 61 (9)                    |
| <b>Sex (%female)</b>                 | 80                        | 75                        | 88                        |
| <b>Race (%white)</b>                 | 62                        | 99                        | 62                        |
| <b>BMI, kg/m<sup>2</sup></b>         | 27 (6)                    | 30 (9)                    | 29 (6)                    |
| <b>WHO FC (I+II versus III+IV %)</b> | 39/61                     | 58/42                     | 47/53                     |
| <b>6MWD, m</b>                       | 336 (99)                  | 345 (98)                  | 285 (140)                 |
| <b>eGFR, mL/min</b>                  | 74 (29)                   | 76 (30)                   | 85 (26)                   |
| <b>Median UA, mg/dL, (IQR)</b>       | 6.8 (2.7)                 | 6.5 (2.0)                 | 5.4 (3.5)                 |
| <b>Median NT-proBNP pg/dL (IQR)</b>  | 515 (213-1663)            | 360 (185-693)             | 130 (82-266)              |
| <b>RAP, mmHg</b>                     | 7 (4)                     | 8 (4)                     | 5 (3)                     |
| <b>meanPAP, mmHg</b>                 | 38 (11)                   | 34 (6)                    | 32 (9)                    |
| <b>PCWP, mmHg</b>                    | 10 (3)                    | 18 (3)                    | 10 (4)                    |
| <b>CO, L/min</b>                     | 4.8 (1.6)                 | 5.7 (2.7)                 | 5.5 (1.4)                 |
| <b>CI, L/min/m<sup>2</sup></b>       | 2.7 (0.9)                 | 3.0 (1.0)                 | 2.9 (0.6)                 |
| <b>PVR, Wood units</b>               | 6.8 (4.9)                 | 3.0 (1.5)                 | 4.3 (2.4)                 |
| <b>FVC % predicted</b>               | 84 (17)                   | 76 (17)                   | 60 (19)                   |
| <b>FEV<sub>1</sub> % predicted</b>   | 79 (16)                   | 74 (16)                   | 60 (19)                   |
| <b>FEV1/FVC %</b>                    | 75 (12)                   | 73 (7)                    | 78 (9)                    |
| <b>DLCO % predicted</b>              | 53 (15)                   | 71 (29)                   | 49 (20)                   |
| <b>Deaths, n (%)</b>                 | 48 (59)                   | 6 (50)                    | 8 (47)                    |

Definition of abbreviations: BMI=body mass index; WHO FC= World Health Organization Functional Class; 6MWD= six minute walk distance; eGFR=estimated glomerular filtration rate; UA=uric acid; RAP=right atrial pressure; meanPAP= mean pulmonary arterial pressure; PCWP= pulmonary capillary wedge pressure; CO= cardiac output; CI= cardiac index; PVR= pulmonary vascular resistance; FVC: forced vital capacity; FEV1: forced expiratory volume in 1 second; DLCO: diffusing capacity for carbon monoxide.  
All values reported as mean (SD) unless otherwise specified. IQR: interquartile range.

**Supplemental Table 2. Logistic Regression Models and Corresponding Receiver Operating Characteristics for Noninvasive Markers of PAH**

| <b>Diagnostic Markers</b> | <b>Univariable logistic regression models</b> | <b>Multivariable logistic regression model</b> |                |                          |
|---------------------------|-----------------------------------------------|------------------------------------------------|----------------|--------------------------|
|                           | <b>ROC AUC (95% CI)</b>                       | <b>Coefficient (95% CI)</b>                    | <b>p-value</b> | <b>*ROC AUC (95% CI)</b> |
| <b>NT-proBNP, pg/dL</b>   | 0.721 (0.629-0.801)                           | 0.001 (0.00-0.002)                             | 0.0474         |                          |
| <b>DLCO, % predicted</b>  | 0.721 (0.633-0.797)                           | -0.045 (-0.020- -0.070)                        | 0.0005         |                          |

|                  |                     |                     |        |                       |
|------------------|---------------------|---------------------|--------|-----------------------|
| <b>UA, mg/dL</b> | 0.725 (0.641-0.799) | 0.332 (0.028-0.636) | 0.0321 | **0.844 (0.761-0.906) |
|------------------|---------------------|---------------------|--------|-----------------------|

Definition of abbreviations: ROC AUC: receiver operating characteristics area under the curve; CI: confidence interval; DLCO: diffusing capacity for carbon monoxide; BNP: brain natriuretic peptide; UA: uric acid.  
\*ROC AUC is for full multivariable logistic regression model, which includes all 3 markers.  
\*\*AUC 0.844 is significantly greater than AUC for each individual marker, p<0.05.

**Supplemental Table 3. Univariable Cox Proportional Hazard Ratios for Survival**

|                                            | <b>Overall Cohort HR<br/>(95% CI, p value)</b> | <b>PAH Subgroup HR<br/>(95% CI, p value)</b> |
|--------------------------------------------|------------------------------------------------|----------------------------------------------|
| <b>Age, years</b>                          | 1.03 (1.01-1.05, <0.01)                        | 1.01 (0.99-1.04, 0.28)                       |
| <b>Sex (female)</b>                        | 1.13 (0.64-2.00, 0.67)                         | 1.02 (0.47-2.20, 0.96)                       |
| <b>WHO FC (III,IV vs I,II)</b>             | 1.70 (1.07-2.71, <0.05)                        | 1.22 (0.66-2.27, 0.52)                       |
| <b>6MWD, m</b>                             | 0.999 (0.998-0.999, <0.01)                     | 0.999 (0.998-1.00, 0.26)                     |
| <b>NT-proBNP, pg/dL (log<sub>10</sub>)</b> | 2.93 (1.85-4.64, <0.01)                        | 2.13 (1.13-4.05, <0.05)                      |
| <b>DLCO % predicted</b>                    | 0.98 (0.97-0.99, <0.01)                        | 0.97 (0.95-0.99, <0.05)                      |

|                                |                         |                         |
|--------------------------------|-------------------------|-------------------------|
| <b>RAP, mmHg</b>               | 1.02 (0.96-1.09, 0.45)  | 0.99 (0.91-1.07, 0.75)  |
| <b>meanPAP, mmHg</b>           | 1.03 (1.02-1.05, <0.01) | 1.02 (1.00-1.05, <0.05) |
| <b>PCWP, mmHg</b>              | 0.99 (0.94-1.05, 0.87)  | 0.94 (0.86-1.03, 0.17)  |
| <b>CO, L/min</b>               | 0.87 (0.74-1.02, 0.09)  | 0.88 (0.73-1.06, 0.18)  |
| <b>CI, L/min/m<sup>2</sup></b> | 0.88 (0.64-1.22, 0.44)  | 0.88 (0.60-1.29, 0.51)  |
| <b>PVR, Wood units</b>         | 1.08 (1.04-1.12, <0.01) | 1.05 (1.00-1.11, 0.06)  |
| <b>UA, mg/dL</b>               | 1.14 (1.02-1.28, <0.05) | 1.10 (0.95-1.27, 0.20)  |
| <b>UA&gt;6.3mg/dL</b>          | 1.77 (1.12-2.80, <0.05) | 1.68 (0.89-3.15, 0.11)  |

Definition of abbreviations: WHO FC: World Health organization functional class; 6MWD: six minute walk distance; DLCO: diffusing capacity for carbon monoxide; BNP: brain natriuretic peptide; RAP=right atrial pressure; meanPAP= mean pulmonary arterial pressure; PCWP= pulmonary capillary wedge pressure; CO= cardiac output; CI= cardiac index; PVR= pulmonary vascular resistance; UA: uric acid
